# Supplementary material for: Retinal Microcirculation Changes in Crohn’s Disease Patients under Biologics, a Potential Biomarker of Severity: A Pilot Study
Source: MDPI journal article supplement (doi:10.3390/jpm12020230), 2022-02-07
Supplement: s1 [file s1]

## Online-Only Supplements

**Table S1. Age- and sex-adjusted analysis of covariance: association of the main microvascular variables according to clinical activity (n=74).**

|                                     | Clinical activity |              | p-value <sup>1</sup> |
|-------------------------------------|-------------------|--------------|----------------------|
|                                     | Yes, N = 21       | No, N = 53   |                      |
| <b>FAZ area (mm<sup>2</sup>)</b>    | 0.29 (0.02)       | 0.26 (0.01)  | 0.14                 |
| <b>Whole SCP-VD (%)</b>             | 47.8 (0.8)        | 47.7 (0.5)   | 0.78                 |
| <b>Parafoveal SCP-VD (%)</b>        | 50.8 (0.9)        | 50.4 (0.5)   | 0.55                 |
| <b>RPC-VD (%)</b>                   | 52.3 (0.6)        | 51.1 (0.38)  | 0.10                 |
| <b>ln (SCP-FI) (mm<sup>2</sup>)</b> | 0.30 (0.02)       | 0.30 (0.01)  | 0.88                 |
| <b>ln (DCP-FI) (mm<sup>2</sup>)</b> | -0.79 (0.13)      | -1.03 (0.08) | 0.07                 |
| <b>CCP-FI (mm<sup>2</sup>)</b>      | 2.10 (0.03)       | 2.12 (0.02)  | 0.60                 |

Data are mean (SEM).

<sup>1</sup>Model adjusted for sex and age: all potential confounders had a p-value  $\geq 0.20$  on univariate analysis

*Abbreviations:* CCP, choriocapillaris plexus; DCP, deep capillary plexus; FAZ, foveal avascular zone; FI, flow index; SCP, superficial capillary plexus; RPC, radial peripapillary capillaries; SEM, standard error of the mean; VD, vascular density

**Table S2. Age-, sex- and tobacco use- adjusted analysis of covariance: association of the main microvascular variables with deep activity status (n=68).**

|                                     | Deep activity |             | p-value <sup>1</sup> |
|-------------------------------------|---------------|-------------|----------------------|
|                                     | Yes, N = 34   | No, N = 34  |                      |
| <b>FAZ area (mm<sup>2</sup>)</b>    | 0.29 (0.02)   | 0.26 (0.02) | 0.31                 |
| <b>Whole SCP-VD (%)</b>             | 47.4 (0.6)    | 48.0 (0.7)  | 0.32                 |
| <b>Parafoveal SCP-VD (%)</b>        | 50.2 (0.7)    | 50.8 (0.8)  | 0.29                 |
| <b>RPC-VD (%)</b>                   | 51.6 (0.5)    | 51.6 (0.5)  | 0.99                 |
| <b>Ln (SCP-FI) (mm<sup>2</sup>)</b> | 0.29 (0.02)   | 0.32 (0.02) | 0.26                 |
| <b>Ln (DCP-FI) (mm<sup>2</sup>)</b> | -0.85 (0.1)   | -1.0 (0.1)  | 0.17                 |
| <b>CCP-FI (mm<sup>2</sup>)</b>      | 2.12 (0.02)   | 2.14 (0.02) | 0.80                 |

Data are mean (SEM).

<sup>1</sup>Model adjusted for sex, age and tobacco: tobacco was the only potential confounder with a p value  $< 0.20$  (Chi 2 test, p=0.18)

*Abbreviations:* CCP, choriocapillaris plexus; DCP, deep capillary plexus; FAZ, foveal avascular zone; FI, flow index; SCP, superficial capillary plexus; RPC, radial peripapillary capillaries; SEM, standard error of the mean; VD, vascular density
